# Supplementary material for: Fecal Microbiota Transplantation Could Improve Chronic Diarrhea in Cynomolgus Monkey by Alleviating Inflammation and Modulating Gut Microbiota
Source: MDPI journal article supplement (doi:10.3390/biomedicines10123016), 2022-11-23
Supplement: s1 [file s1]

## Supplementary Materials

**Table S1.** Summary information of cynomolgus monkeys

| Sample ID               | Gender | Age (years old) | Group |
|-------------------------|--------|-----------------|-------|
| HC_1                    | Male   | 7               | HC    |
| HC_2                    | Male   | 7               | HC    |
| HC_3                    | Male   | 7               | HC    |
| HC_4                    | Male   | 7               | HC    |
| 0_Diarrhea_1 (0_174317) | Male   | 5               | Day_0 |
| 0_Diarrhea_2 (0_180552) | Male   | 4               | Day_0 |
| 0_Diarrhea_3 (0_186850) | Male   | 4               | Day_0 |
| 2_Diarrhea_1 (2_174317) | Male   | 5               | Day_2 |
| 2_Diarrhea_2 (2_180552) | Male   | 4               | Day_2 |
| 2_Diarrhea_3 (2_186850) | Male   | 4               | Day_2 |
| 4_Diarrhea_1 (4_174317) | Male   | 5               | Day_4 |
| 4_Diarrhea_2 (4_180552) | Male   | 4               | Day_4 |
| 4_Diarrhea_3 (4_186850) | Male   | 4               | Day_4 |
| 8_Diarrhea_1 (8_174317) | Male   | 5               | Day_8 |
| 8_Diarrhea_2 (8_180552) | Male   | 4               | Day_8 |
| 8_Diarrhea_3 (8_186850) | Male   | 4               | Day_8 |

**Table S2.** Bristol stool scale

| Typing | Form                  | Description                                                          |
|--------|-----------------------|----------------------------------------------------------------------|
| 1      | Nut-like stool        | Hard, small pieces, like rabbit dung                                 |
| 2      | Dry hard stool        | Hard texture with multiple small pieces stuck together, sausage-like |
| 3      | Wrinkled stool        | The surface is covered with cracks and is sausage-like               |
| 4      | Banana-shaped stool   | Soft texture, smooth surface, sausage-like                           |
| 5      | Soft stool            | Soft semi-solid with uneven edges                                    |
| 6      | Slightly shaped stool | Soft flakes, porridge with rough edges or no fixed shape             |
| 7      | Watery stool          | Watery, completely liquid without solids                             |

**Table S3.** PERMANOVA in microbial species composition

| Phenotypes    | <i>F</i> | <i>R</i> <sup>2</sup> | <i>P</i> value |
|---------------|----------|-----------------------|----------------|
| Grouping      | 1.388523 | 0.335512              | 0.102897       |
| BSS           | 2.137205 | 0.13244               | 0.043956       |
| IL-6          | 2.028222 | 0.126541              | 0.040959       |
| IL-8          | 0.901766 | 0.060514              | 0.484515       |
| IL-1 $\beta$  | 1.268482 | 0.083078              | 0.236763       |
| IFN- $\gamma$ | 1.053468 | 0.069982              | 0.390609       |
| IL-4          | 0.629051 | 0.043                 | 0.811189       |
| IL-10         | 0.653095 | 0.04457               | 0.778222       |

*F* represents the *F*-statistic: alarger *F* value indicates that the between-group variation is greater than within-group variation. *R*<sup>2</sup> represents the variation explained by the model. *q* represents the *q*-value calculated from permutation.

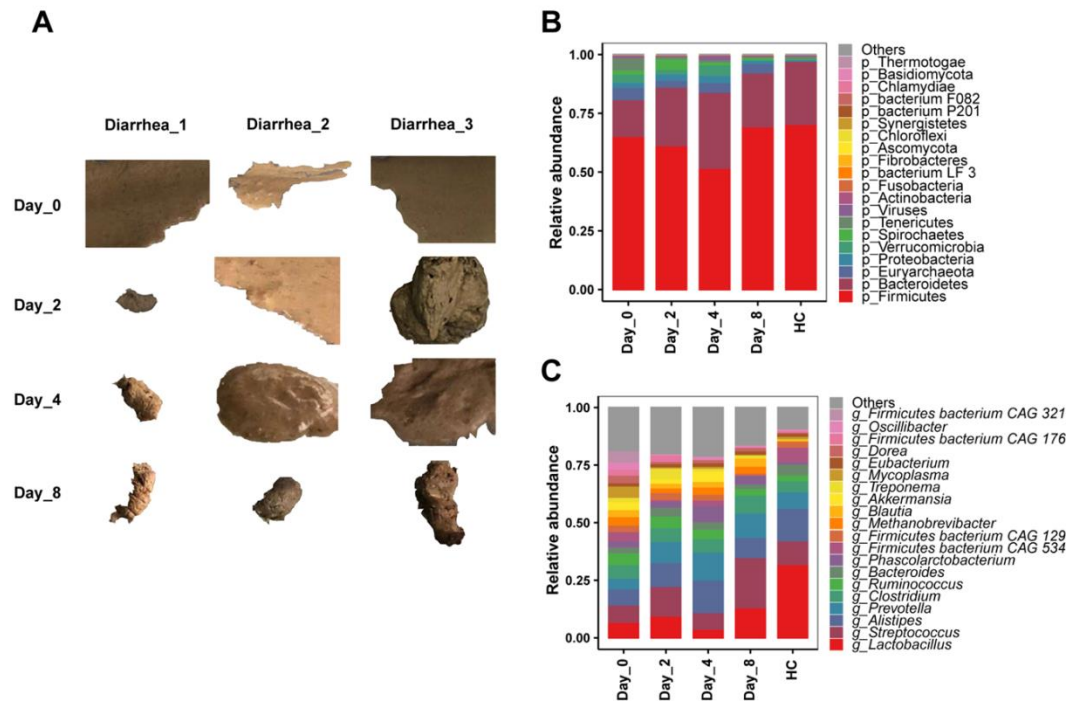

**Figure S1.** Effects of the FMT treatment on the incidence of diarrhea and gut microbiome. **(A)** Images of the fecal samples collected from Day\_0 (n = 3), Day\_2 (n = 3), Day\_4 (n = 3) and Day\_8 (n = 3). **(B)** The distribution of dominant bacterial phyla in all 5 groups. **(C)** The distribution of dominant bacterial genus in all 5 groups. HC, asymptomatic monkeys (n = 4); Day\_0, chronic diarrhea monkeys before FMT intervention (n = 3); Day\_2, Day\_4, Day\_8, chronic diarrhea monkeys after FMT intervention (n = 3 respectively).

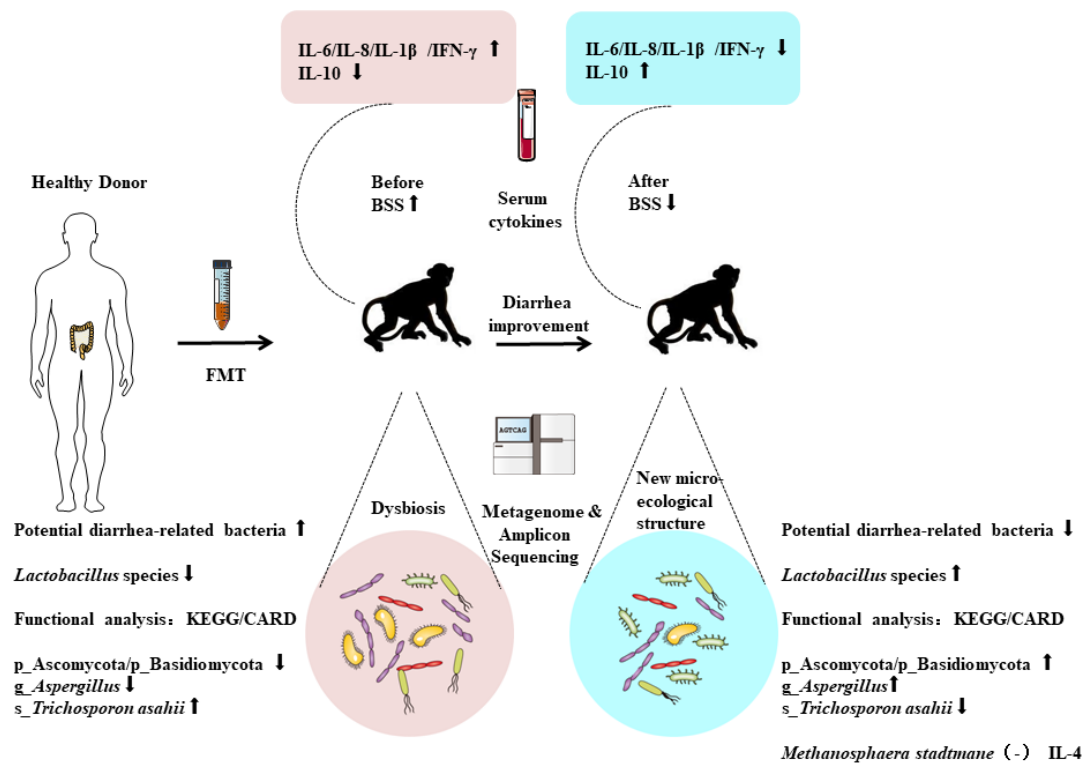

**Figure S2.** Summary of the study findings.
